# Supplementary material for: Rest-activity circadian rhythms and bone mineral density in elderly men
Source: PubMed Central journal article supplement — Bone Rep. 2017 Nov 10;7:156–63. doi: 10.1016/j.bonr.2017.11.001 (PMC5695538; doi:10.1016/j.bonr.2017.11.001), 2017-11-10
Supplement: mmc1.pdf [file mmc1.pdf]

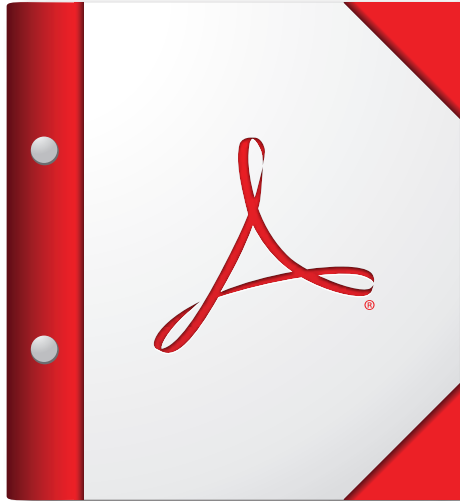

**For the best experience, open this PDF portfolio in  
Acrobat 9 or Adobe Reader 9, or later.**

[Get Adobe Reader Now!](#)
